# Supplementary material
Source: MDPI journal article supplement (https://www.mdpi.com/2312-7481/6/3/29)

# checkCIF/PLATON report

Structure factors have been supplied for datablock(s) I

THIS REPORT IS FOR GUIDANCE ONLY. IF USED AS PART OF A REVIEW PROCEDURE FOR PUBLICATION, IT SHOULD NOT REPLACE THE EXPERTISE OF AN EXPERIENCED CRYSTALLOGRAPHIC REFEREE.

No syntax errors found.      CIF dictionary      Interpreting this report

## Datablock: I

---

Bond precision:    C-C = 0.0030 A                      Wavelength=0.71075

Cell:                      a=15.3600(6)      b=13.8978(5)                      c=18.4909(8)  
                             alpha=90                      beta=103.4520(11)                      gamma=90  
Temperature:      100 K

|                | Calculated                  | Reported                    |
|----------------|-----------------------------|-----------------------------|
| Volume         | 3839.0(3)                   | 3839.0(3)                   |
| Space group    | P 21/c                      | P 1 21/c 1                  |
| Hall group     | -P 2ybc                     | -P 2ybc                     |
| Moiety formula | C22 H26 Fe N4 O2, C24 H20 B | C22 H26 Fe N4 O2, C24 H20 B |
| Sum formula    | C46 H46 B Fe N4 O2          | C46 H46 B Fe N4 O2          |
| Mr             | 753.53                      | 753.53                      |
| Dx,g cm-3      | 1.304                       | 1.304                       |
| Z              | 4                           | 4                           |
| Mu (mm-1)      | 0.437                       | 0.437                       |
| F000           | 1588.0                      | 1588.0                      |
| F000'          | 1589.89                     |                             |
| h,k,lmax       | 19,18,23                    | 19,18,23                    |
| Nref           | 8755                        | 8737                        |
| Tmin,Tmax      | 0.811,0.957                 | 0.614,0.957                 |
| Tmin'          | 0.753                       |                             |

Correction method= # Reported T Limits: Tmin=0.614 Tmax=0.957  
AbsCorr = MULTI-SCAN

Data completeness= 0.998                      Theta(max)= 27.454

R(reflections)= 0.0485( 7387)                      wR2(reflections)= 0.1245( 8737)

S = 1.091                      Npar= 491

---

The following ALERTS were generated. Each ALERT has the format

**test-name\_ALERT\_alert-type\_alert-level.**

Click on the hyperlinks for more details of the test.

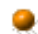

#### Alert level B

PLAT910\_ALERT\_3\_B Missing # of FCF Reflection(s) Below Theta(Min).

12 Note

**Author Response: This alert generated because some reflections were omitted in the refinement.**

PLAT934\_ALERT\_3\_B Number of (Iobs-Icalc)/Sigma(W) > 10 Outliers ..

5 Check

**Author Response: This alert appeared because some reflections were probably affected by the beam stop.**

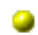

#### Alert level C

PLAT094\_ALERT\_2\_C Ratio of Maximum / Minimum Residual Density ....

2.47 Report

PLAT906\_ALERT\_3\_C Large K Value in the Analysis of Variance .....

3.679 Check

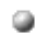

#### Alert level G

PLAT004\_ALERT\_5\_G Polymeric Structure Found with Maximum Dimension

1 Info

PLAT063\_ALERT\_4\_G Crystal Size Possibly too Large for Beam Size ..

0.65 mm

PLAT232\_ALERT\_2\_G Hirshfeld Test Diff (M-X) Fe1 --N2 .

5.3 s.u.

PLAT232\_ALERT\_2\_G Hirshfeld Test Diff (M-X) Fe1 --N3 .

7.1 s.u.

PLAT232\_ALERT\_2\_G Hirshfeld Test Diff (M-X) Fe1 --N4\_b .

9.0 s.u.

PLAT794\_ALERT\_5\_G Tentative Bond Valency for Fe1 (III) .

3.93 Info

PLAT882\_ALERT\_1\_G No Datum for \_diffrn\_reflms\_av\_unetI/netI .....

Please Do !

PLAT912\_ALERT\_4\_G Missing # of FCF Reflections Above STh/L= 0.600

7 Note

PLAT941\_ALERT\_3\_G Average HKL Measurement Multiplicity .....

3.8 Low

PLAT978\_ALERT\_2\_G Number C-C Bonds with Positive Residual Density.

13 Info

- 
- 0 **ALERT level A** = Most likely a serious problem - resolve or explain  
2 **ALERT level B** = A potentially serious problem, consider carefully  
2 **ALERT level C** = Check. Ensure it is not caused by an omission or oversight  
10 **ALERT level G** = General information/check it is not something unexpected

- 1 ALERT type 1 CIF construction/syntax error, inconsistent or missing data  
5 ALERT type 2 Indicator that the structure model may be wrong or deficient  
4 ALERT type 3 Indicator that the structure quality may be low  
2 ALERT type 4 Improvement, methodology, query or suggestion  
2 ALERT type 5 Informative message, check
-

## Publication of your CIF

You should attempt to resolve as many as possible of the alerts in all categories. Often the minor alerts point to easily fixed oversights, errors and omissions in your CIF or refinement strategy, so attention to these fine details can be worthwhile. In order to resolve some of the more serious problems it may be necessary to carry out additional measurements or structure refinements. However, the nature of your study may justify the reported deviations from journal submission requirements and the more serious of these should be commented upon in the discussion or experimental section of a paper or in the "special\_details" fields of the CIF. *checkCIF* was carefully designed to identify outliers and unusual parameters, but every test has its limitations and alerts that are not important in a particular case may appear. Conversely, the absence of alerts does not guarantee there are no aspects of the results needing attention. It is up to the individual to critically assess their own results and, if necessary, seek expert advice.

If you wish to submit your CIF for publication in Acta Crystallographica Section C or E, you should upload your CIF via the web. If you wish to submit your CIF for publication in IUCrData you should upload your CIF via the web. If your CIF is to form part of a submission to another IUCr journal, you will be asked, either during electronic submission or by the Co-editor handling your paper, to upload your CIF via our web site.

---

**PLATON version of 04/06/2020; check.def file version of 02/06/2020**

Datablock I - ellipsoid plot

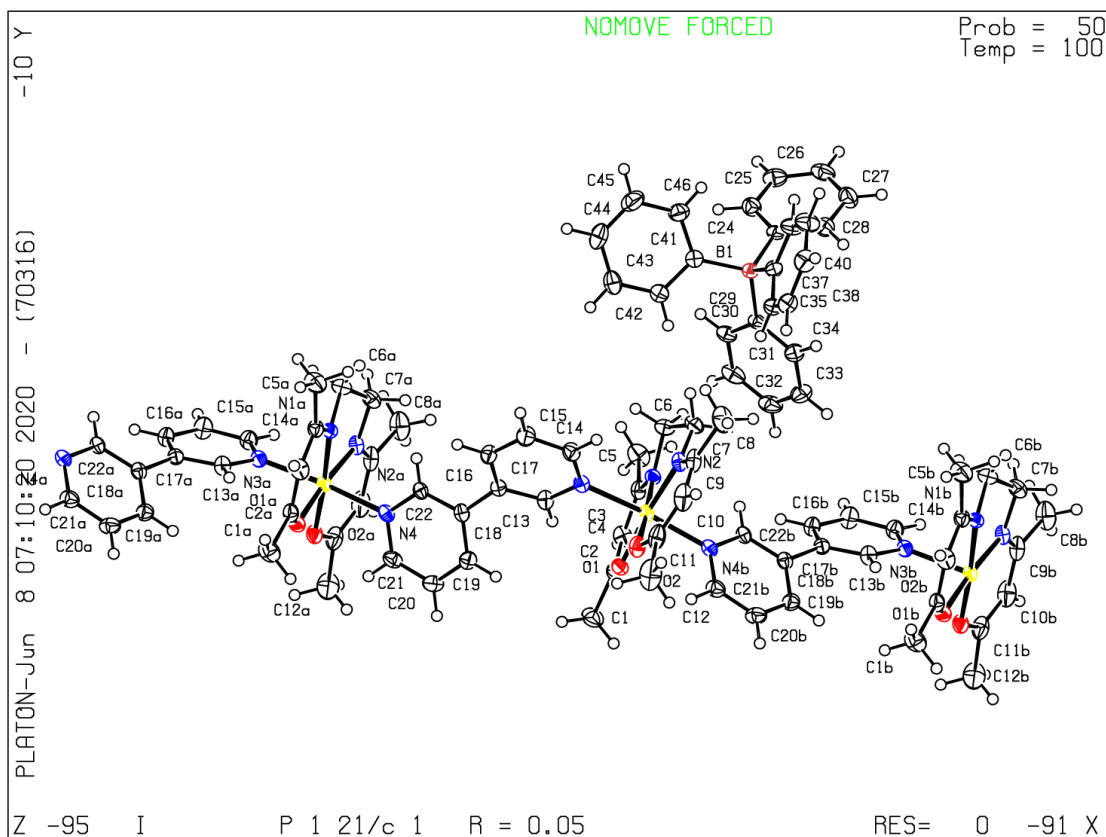

Supplement: s1 [file s1]
