# Supplementary material
Source: MDPI journal article supplement (https://www.mdpi.com/2312-7481/6/3/29)

# checkCIF/PLATON report

Structure factors have been supplied for datablock(s) I

THIS REPORT IS FOR GUIDANCE ONLY. IF USED AS PART OF A REVIEW PROCEDURE FOR PUBLICATION, IT SHOULD NOT REPLACE THE EXPERTISE OF AN EXPERIENCED CRYSTALLOGRAPHIC REFEREE.

No syntax errors found.      CIF dictionary      Interpreting this report

## Datablock: I

---

|                 |                                                   |                                                    |
|-----------------|---------------------------------------------------|----------------------------------------------------|
| Bond precision: | C-C = 0.0057 Å                                    | Wavelength=0.71075                                 |
| Cell:           | a=11.5785(4)                                      | b=36.8734(10)      c=16.5868(5)                    |
|                 | alpha=90                                          | beta=103.385(7)      gamma=90                      |
| Temperature:    | 300 K                                             |                                                    |
|                 | Calculated                                        | Reported                                           |
| Volume          | 6889.2(4)                                         | 6889.2(4)                                          |
| Space group     | P 21/n                                            | P 1 21/n 1                                         |
| Hall group      | -P 2yn                                            | -P 2yn                                             |
| Moiety formula  | C22 H26 Fe N4 O2, 2(C24 H20 B), C5 H4 N, C6 H11 N | C22 H26 Fe N4 O2, 2(C24 H20, B), C5 H4 N, C6 H16 N |
| Sum formula     | C81 H81 B2 Fe N6 O2                               | C81 H86 B2 Fe N6 O2                                |
| Mr              | 1247.99                                           | 1253.03                                            |
| Dx, g cm-3      | 1.203                                             | 1.208                                              |
| Z               | 4                                                 | 4                                                  |
| Mu (mm-1)       | 0.271                                             | 0.271                                              |
| F000            | 2644.0                                            | 2664.0                                             |
| F000'           | 2646.24                                           |                                                    |
| h,k,lmax        | 15,47,21                                          | 15,47,21                                           |
| Nref            | 15789                                             | 15732                                              |
| Tmin,Tmax       | 0.920,0.987                                       | 0.641,0.987                                        |
| Tmin'           | 0.867                                             |                                                    |

Correction method= # Reported T Limits: Tmin=0.641 Tmax=0.987  
AbsCorr = MULTI-SCAN

Data completeness= 0.996      Theta(max)= 27.484

R(reflections)= 0.0673( 8554)      wR2(reflections)= 0.1747( 15732)

S = 1.011      Npar= 844

---

The following ALERTS were generated. Each ALERT has the format

**test-name\_ALERT\_alert-type\_alert-level.**

Click on the hyperlinks for more details of the test.

## Alert level C

|                   |                                                  |                |              |
|-------------------|--------------------------------------------------|----------------|--------------|
| PLAT041_ALERT_1_C | Calc. and Reported SumFormula                    | Strings Differ | Please Check |
| PLAT043_ALERT_1_C | Calculated and Reported Mol. Weight Differ by .. | 5.04           | Check        |
| PLAT068_ALERT_1_C | Reported F000 Differs from Calcd (or Missing)... |                | Please Check |
| PLAT230_ALERT_2_C | Hirshfeld Test Diff for N3                       | --C14 .        | 6.0 s.u.     |
| PLAT230_ALERT_2_C | Hirshfeld Test Diff for C35                      | --C36 .        | 5.2 s.u.     |
| PLAT234_ALERT_4_C | Large Hirshfeld Difference N6                    | --C76 .        | 0.18 Ang.    |
| PLAT241_ALERT_2_C | High 'MainMol' Ueq as Compared to Neighbors of   | C7             | Check        |
| PLAT241_ALERT_2_C | High 'MainMol' Ueq as Compared to Neighbors of   | C33            | Check        |
| PLAT241_ALERT_2_C | High 'MainMol' Ueq as Compared to Neighbors of   | C43            | Check        |
| PLAT243_ALERT_4_C | High 'Solvent' Ueq as Compared to Neighbors of   | C74            | Check        |
| PLAT243_ALERT_4_C | High 'Solvent' Ueq as Compared to Neighbors of   | C75            | Check        |
| PLAT243_ALERT_4_C | High 'Solvent' Ueq as Compared to Neighbors of   | C76            | Check        |
| PLAT243_ALERT_4_C | High 'Solvent' Ueq as Compared to Neighbors of   | C80            | Check        |
| PLAT244_ALERT_4_C | Low 'Solvent' Ueq as Compared to Neighbors of    | C73            | Check        |
| PLAT244_ALERT_4_C | Low 'Solvent' Ueq as Compared to Neighbors of    | N6             | Check        |
| PLAT244_ALERT_4_C | Low 'Solvent' Ueq as Compared to Neighbors of    | C78            | Check        |
| PLAT250_ALERT_2_C | Large U3/U1 Ratio for Average U(i,j) Tensor .... | 2.4            | Note         |
| PLAT260_ALERT_2_C | Large Average Ueq of Residue Including N6        | 0.155          | Check        |
| PLAT360_ALERT_2_C | Short C(sp3)-C(sp3) Bond C76 - C77 .             | 1.38           | Ang.         |

## Alert level G

FORMU01\_ALERT\_1\_G There is a discrepancy between the atom counts in the  
     \_chemical\_formula\_sum and \_chemical\_formula\_moiety. This is  
     usually due to the moiety formula being in the wrong format.  
     Atom count from \_chemical\_formula\_sum: C81 H86 B2 Fe1 N6 O2  
     Atom count from \_chemical\_formula\_moiety:C81 H86 B1 Fe1 N6 O2

FORMU01\_ALERT\_2\_G There is a discrepancy between the atom counts in the  
     \_chemical\_formula\_sum and the formula from the \_atom\_site\* data.  
     Atom count from \_chemical\_formula\_sum:C81 H86 B2 Fe1 N6 O2  
     Atom count from the \_atom\_site data: C81 H81 B2 Fe1 N6 O2

CELLZ01\_ALERT\_1\_G Difference between formula and atom\_site contents detected.

CELLZ01\_ALERT\_1\_G WARNING: H atoms missing from atom site list. Is this intentional?  
     From the CIF: \_cell\_formula\_units\_Z 4  
     From the CIF: \_chemical\_formula\_sum C81 H86 B2 Fe N6 O2  
     TEST: Compare cell contents of formula and atom\_site data

|      |           |           |       |
|------|-----------|-----------|-------|
| atom | Z*formula | cif sites | diff  |
| C    | 324.00    | 324.00    | 0.00  |
| H    | 344.00    | 324.00    | 20.00 |
| B    | 8.00      | 8.00      | 0.00  |
| Fe   | 4.00      | 4.00      | 0.00  |
| N    | 24.00     | 24.00     | 0.00  |
| O    | 8.00      | 8.00      | 0.00  |

PLAT004\_ALERT\_5\_G Polymeric Structure Found with Maximum Dimension 1 Info

PLAT007\_ALERT\_5\_G Number of Unrefined Donor-H Atoms ..... 1 Report

PLAT012\_ALERT\_1\_G N.O.K. \_shelx\_res\_checksum Found in CIF ..... Please Check

PLAT042\_ALERT\_1\_G Calc. and Reported MoietyFormula Strings Differ Please Check

PLAT231\_ALERT\_4\_G Hirshfeld Test (Solvent) C76 --C77 . 5.2 s.u.

PLAT231\_ALERT\_4\_G Hirshfeld Test (Solvent) C80 --C81A . 7.8 s.u.

PLAT300\_ALERT\_4\_G Atom Site Occupancy of C81A Constrained at 0.5 Check

PLAT300\_ALERT\_4\_G Atom Site Occupancy of C81B Constrained at 0.5 Check

PLAT302\_ALERT\_4\_G Anion/Solvent/Minor-Residue Disorder (Resd 5 ) 14% Note

PLAT432\_ALERT\_2\_G Short Inter X...Y Contact C33 ..C81B 3.08 Ang.  
     -1/2+x,3/2-y,-1/2+z = 4\_575 Check

PLAT794\_ALERT\_5\_G Tentative Bond Valency for Fe1 (III) . 3.99 Info  
PLAT882\_ALERT\_1\_G No Datum for \_diffrn\_reflms\_av\_unetI/netI ..... Please Do !

---

0 **ALERT level A** = Most likely a serious problem - resolve or explain  
0 **ALERT level B** = A potentially serious problem, consider carefully  
19 **ALERT level C** = Check. Ensure it is not caused by an omission or oversight  
16 **ALERT level G** = General information/check it is not something unexpected

9 ALERT type 1 CIF construction/syntax error, inconsistent or missing data  
10 ALERT type 2 Indicator that the structure model may be wrong or deficient  
0 ALERT type 3 Indicator that the structure quality may be low  
13 ALERT type 4 Improvement, methodology, query or suggestion  
3 ALERT type 5 Informative message, check

---

## Publication of your CIF

You should attempt to resolve as many as possible of the alerts in all categories. Often the minor alerts point to easily fixed oversights, errors and omissions in your CIF or refinement strategy, so attention to these fine details can be worthwhile. In order to resolve some of the more serious problems it may be necessary to carry out additional measurements or structure refinements. However, the nature of your study may justify the reported deviations from journal submission requirements and the more serious of these should be commented upon in the discussion or experimental section of a paper or in the "special\_details" fields of the CIF. *checkCIF* was carefully designed to identify outliers and unusual parameters, but every test has its limitations and alerts that are not important in a particular case may appear. Conversely, the absence of alerts does not guarantee there are no aspects of the results needing attention. It is up to the individual to critically assess their own results and, if necessary, seek expert advice.

If you wish to submit your CIF for publication in Acta Crystallographica Section C or E, you should upload your CIF via the web. If you wish to submit your CIF for publication in IUCrData you should upload your CIF via the web. If your CIF is to form part of a submission to another IUCr journal, you will be asked, either during electronic submission or by the Co-editor handling your paper, to upload your CIF via our web site.

---

**PLATON version of 04/06/2020; check.def file version of 02/06/2020**

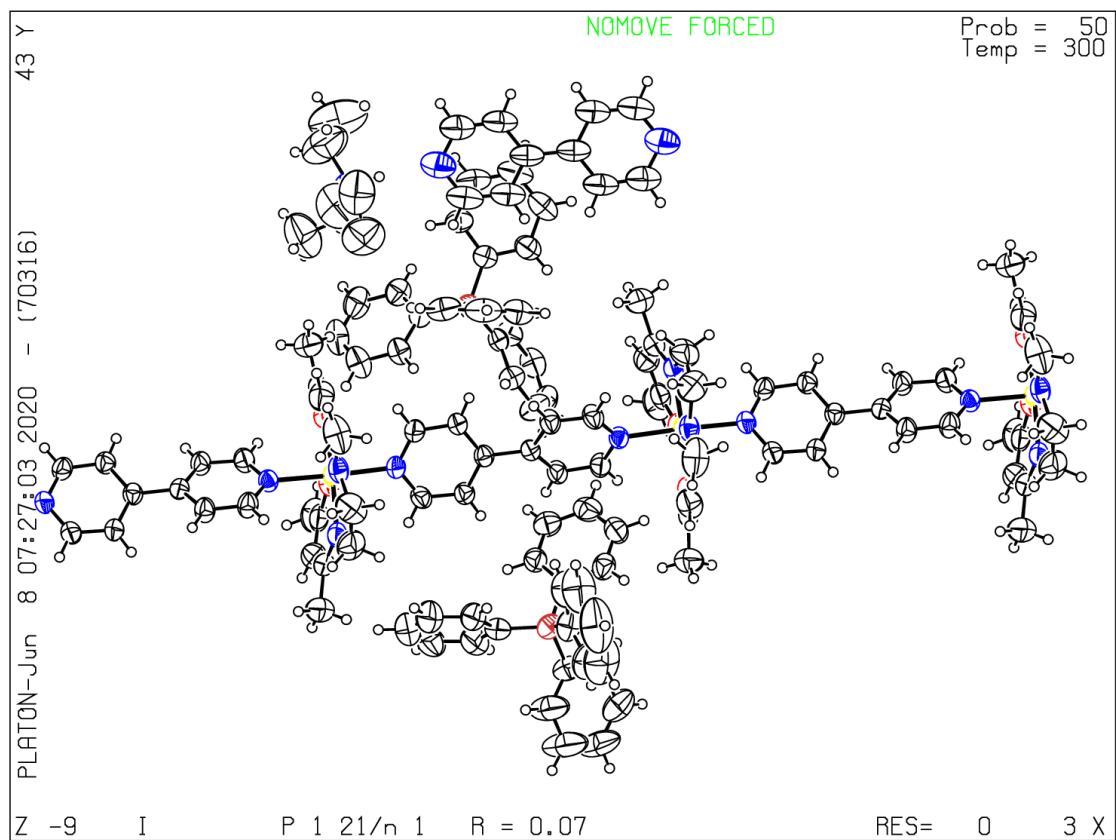

Supplement: s1 [file s1]
